# Supplementary material for: Integrin α6β4E variant is associated with actin and CD9 structures and modifies the biophysical properties of cell–cell and cell–extracellular matrix interactions
Source: PubMed Central journal article supplement — Mol Biol Cell. 2019 Mar 21;30(7):838–50. doi: 10.1091/mbc.E18-10-0652 (PMC6589785; doi:10.1091/mbc.e18-10-0652), 2019-03-21

# Supplemental Materials

*Molecular Biology of the Cell*

Wang et al.

## SUPPLEMENTAL FIGURES

**SFIGURE 1:** Integrin  $\beta$ 4E-tGFP expression can be induced by doxycycline by dose and time without changing integrin  $\beta$ 4C expression. (A) Increasing dose of doxycycline results in increasing  $\beta$ 4E mRNA as determined by q-RT-PCR using  $\beta$ 4E specific primers (A, left panel). The induction of  $\beta$ 4E does not change  $\beta$ 4C mRNA as determined by qPCR using  $\beta$ 4C specific primers (A, right panel). (B)  $\beta$ 4E mRNA increases with longer doxycycline treatment and the induction is reversible and determined by q-RT-PCR (B, left panel). The induction and reversal of  $\beta$ 4E mRNA does not change  $\beta$ 4C mRNA (B, right panel). (C) GAPDH was used as internal control in all samples.  $\beta$ 4E-tGFP protein increases with increasing doxycycline treatment time (C, top panels) and dose (C, bottom panels) as determined by flow cytometry analysis.

**SFIGURE 2:**  $\beta$ 4E-tGFP localized at actin associated ring-like patterns independent of Src activation. (A)  $\beta$ 4E-tGFP expressing cells (DOX) cultured in doxycycline (500 ng/ml) for 5 days in confluent culture conditions and were treated with PP2 (10 nM) for the final 2 days. Left panel: Epifluorescence images at the cell-ECM show the distribution of  $\beta$ 4E-tGFP (green,  $\beta$ 4E-tGFP), F-actin (Phalloidin, red), and nuclei (blue). Scale bar: 10 microns. Middle panel:  $\beta$ 4E-tGFP channel only. Right panel: F-actin (Phalloidin) channel only. (B) Boxed region in (A) at higher magnification) shows the distribution of  $\beta$ 4E-tGFP (green,  $\beta$ 4E-tGFP), F-actin (Phalloidin, red), and nuclei (blue), with the corresponding co-localization pixel map (middle panel, white pixels) and a merged image (far right panel). Scale bar: 10 microns

**SFIGURE 3:** Integrin  $\beta$ 4E-tGFP expression did not change biophysical properties of cell-cell and cell-ECM in sub-confluent cells during cell-ECM attachment. (A, B) Different cell densities of 6250 cells per well (A) or 12,500 cells per well (B) were compared. Untreated cells (No DOX) and  $\beta$ 4E-tGFP expressing cells (DOX) cultured in doxycycline (500 ng/ml) were allowed to adhere for 30 mins and ECIS measurements were collected for up to 50 hours, using 40,000 Hz (left panels) or 400 Hz (right panels) under conditions of  $\beta$ 4E-tGFP (DOX) and  $\beta$ 4C (No DOX).

# Supplemental Figure 1

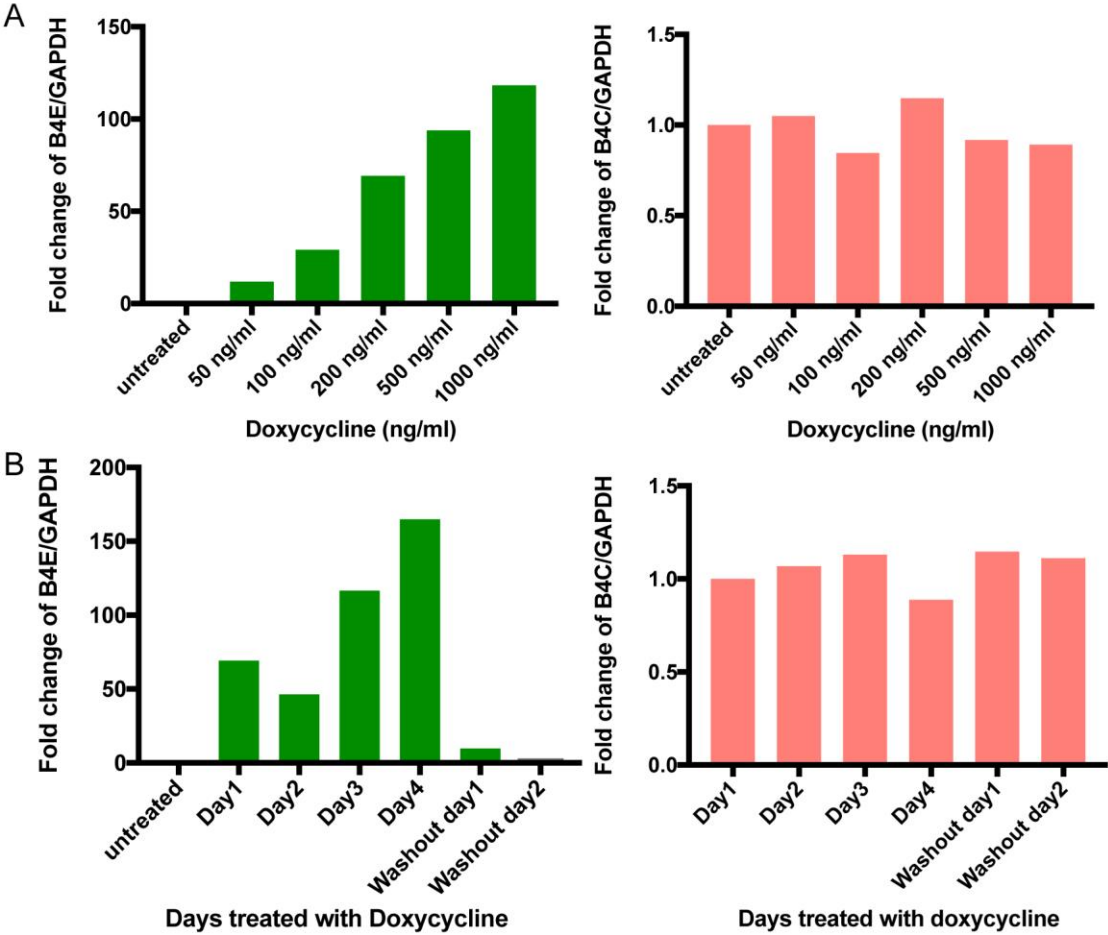

**C**

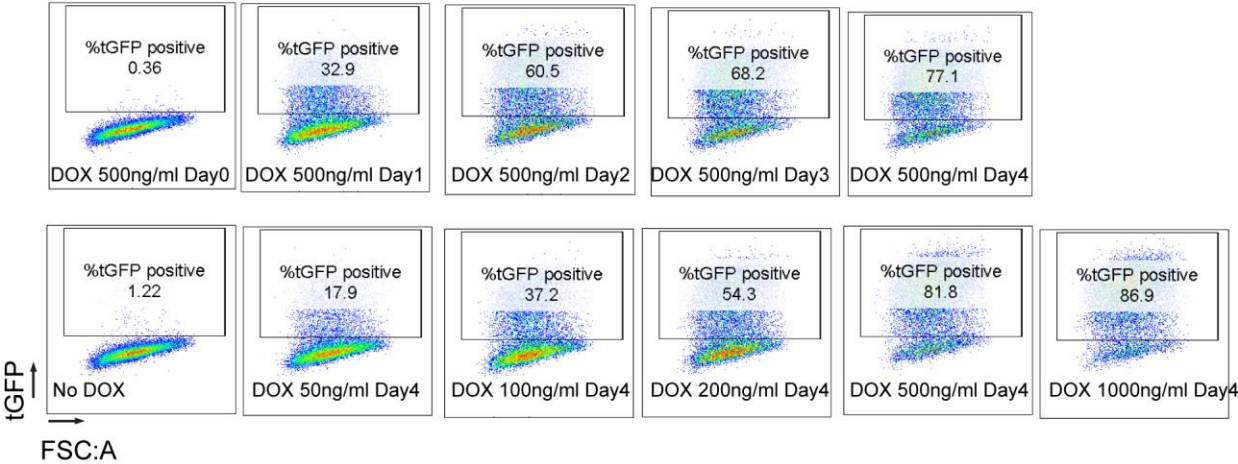

# Supplemental Figure 2

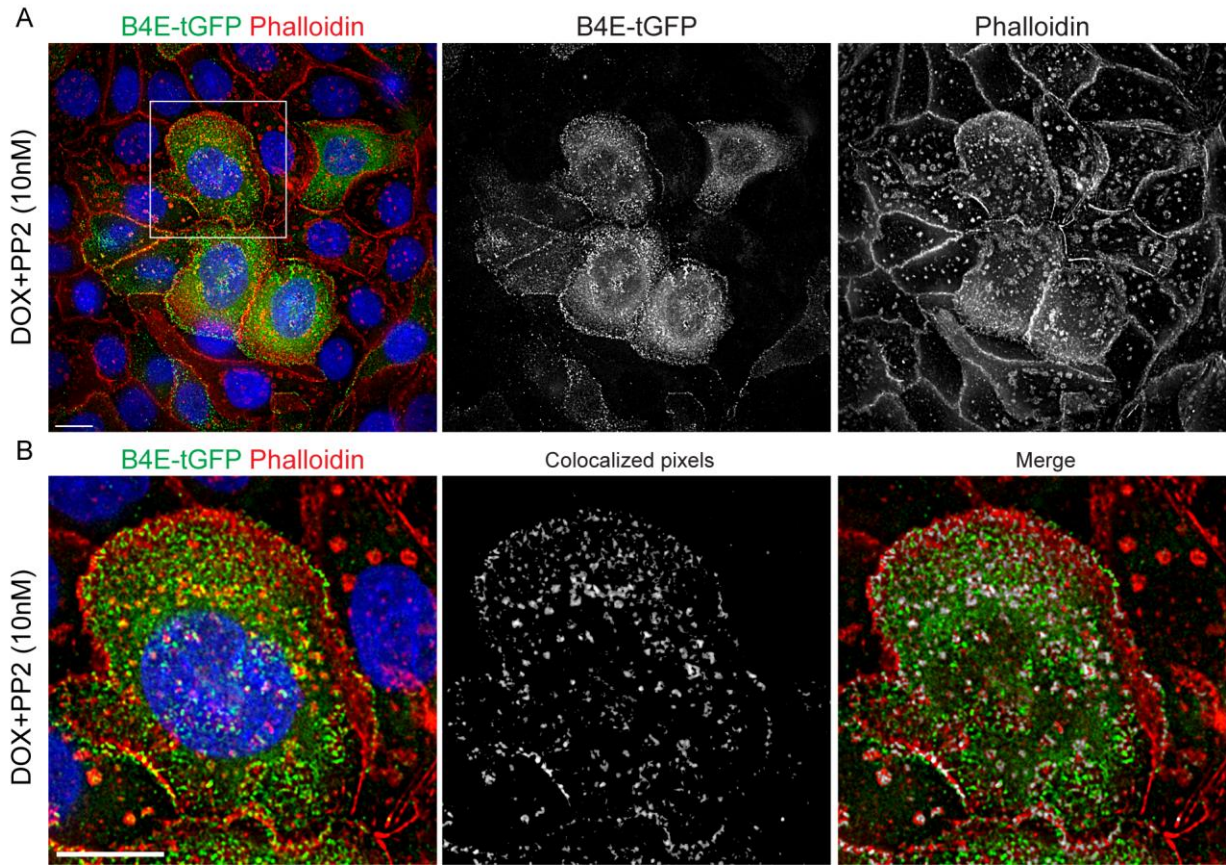

# Supplemental Figure 3

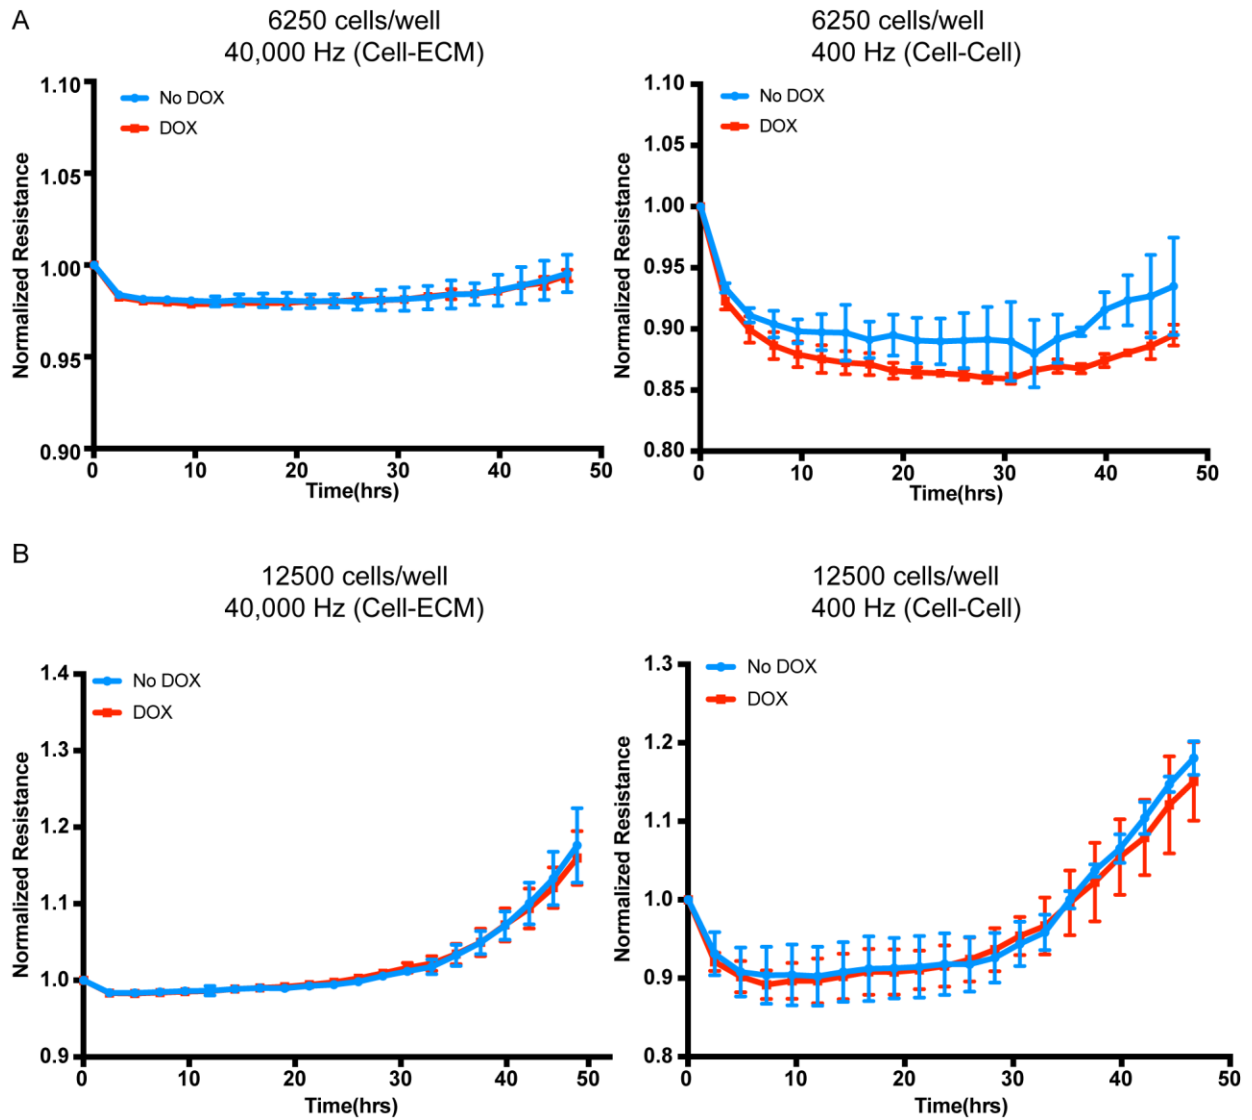

Supplement: mbc-30-838-s001.pdf [file mbc-30-838-s001.pdf]
